# Supplementary material
Source: Copernicus journal article supplement (doi:10.5194/gchron-8-373-2026)
Supplement: Supplementary file 1 [file gchron-8-373-2026-supplement.pdf]

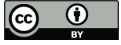

*Supplement of*

## **Extraction of multiple ages from *c*-axis projected fission tracks**

**Peter K. Jensen**

*Correspondence to:* Peter K. Jensen (pklje@dtu.dk)

The copyright of individual parts of the supplement might differ from the article licence.

Calculated age nodes based on fission track data from the Canadian Shield (Spiegel et al., 2023b;2023b) is given in Table S1. The deconvolved fission track length histograms are shown in Fig. S1-S25.

**Table S1.** Calculated age nodes related to deconvolved track length (this study). Rock age is based on stratigraphy given by (Spiegel et al., 2023a) and Geologic Time Scale v. 6.0 (The Geological Society of America). Oldest age (this study), Central age (Spiegel et al., 2023a).

| Sample<br>Lithology   | Rock age                  | Deconvolved<br>track length | Age nodes | Calibration<br>factor |
|-----------------------|---------------------------|-----------------------------|-----------|-----------------------|
|                       | Oldest age<br>Central age |                             |           |                       |
|                       | Ma                        | µm                          | Ma        |                       |
| C-XI-119<br>Sandstone | 388-393                   | 13                          | 222 (52)  | 1.22                  |
|                       | 461 (42)                  | 12                          | 427 (69)  |                       |
|                       | 318 (26)                  |                             |           |                       |
| C-XI-120<br>Sandstone | 388-393                   | 13                          | 176 (76)  | 1.15                  |
|                       | 560 (62)                  | 12                          | 558 (81)  |                       |
|                       | 387 (42)                  |                             |           |                       |
| C-XI-121<br>Granite   | 1600-2500                 | 13                          | 250 (82)  | 1.15                  |
|                       | 510 (60)                  |                             |           |                       |
|                       | 321 (31)                  |                             |           |                       |
| C-XI-123<br>Granite   | 1600-2500                 | 12                          | 410 (62)  | 1.16                  |
|                       | 464 (57)                  |                             |           |                       |
|                       | 285 (29)                  |                             |           |                       |

|                       |           |    |           |      |
|-----------------------|-----------|----|-----------|------|
| C-XI-124<br>Sandstone | 388-393   | 13 | 201 (31)  | 1.16 |
|                       | 322 (24)  | 12 | 322 (25)  |      |
|                       | 236 (108) |    |           |      |
| C-XI-125<br>Sandstone | 383-393   | 13 | 198 (34)  | 1.08 |
|                       | 289 (22)  | 12 | 290 (22)  |      |
|                       | 212 (14)  |    |           |      |
| C-XI-126<br>Sandstone | 359-383   | 13 | 164 (92)  | 1.07 |
|                       | 458 (57)  | 11 | 458 (57)  |      |
|                       | 265 (22)  |    |           |      |
| CXII-06<br>Sandstone  | 247-252   | 12 | 307 (69)  | 1.22 |
|                       | 344 (68)  |    |           |      |
|                       | 218 (28)  |    |           |      |
| CXII-13<br>Granite    | 1600-2500 | 13 | 150 (24)  | 1.06 |
|                       | 214 (17)  | 12 | 214 (17)  |      |
|                       | 160 (11)  |    |           |      |
| CXII-14<br>Granite    | 1600-2500 | 13 | 109 (44)  | 1.3  |
|                       | 339 (27)  | 12 | 338 (47)  |      |
|                       | 235 (18)  |    |           |      |
| CXII-20<br>Sandstone  | 383-393   | 13 | 442 (178) | 1.3  |
|                       | 730 (230) |    |           |      |
|                       | 533 (151) |    |           |      |
| CXII-22<br>Sandstone  | 359-383   | 13 | 228(19)   | 1.13 |
|                       | 523 (95)  | 12 | 619 (87)  |      |
|                       | 399 (36)  |    |           |      |
| CXII-25<br>Migmatite  | 1600-2500 | 13 | 153 (41)  | 1.05 |
|                       | 504 (122) | 12 | 350 (55)  |      |
|                       | 288 (24)  |    |           |      |
| CXII-27<br>Sandstone  | 388-393   | 13 | 265 (55)  | 1.38 |
|                       | 477 (40)  | 12 | 436 (59)  |      |
|                       | 330 (27)  |    |           |      |
| CXII-30<br>Sandstone  | 56-59     | 13 | 257 (74)  | 1.5  |
|                       | 507 (44)  | 12 | 507 (44)  |      |
|                       | 363 (30)  |    |           |      |

|                        |           |    |           |       |
|------------------------|-----------|----|-----------|-------|
| CXII-36<br>Orthogneiss | 1600-2500 | 13 | 377 (106) | 1.43  |
|                        | 739 (101) | 12 | 739 (101) |       |
|                        | 530 (66)  |    |           |       |
| CXII-37<br>Pyroxenite  | 1600-2500 | 13 | 273 (94)  | 1.21  |
|                        | 661 (151) |    |           |       |
|                        | 423 (54)  |    |           |       |
| CXII-42<br>Sandstone   | 388-393   | 13 | 183 (37)  | 1.26  |
|                        | 431 (57)  | 12 | 357 (61)  |       |
|                        | 280 (22)  |    |           |       |
| CXII-46<br>Sandstone   | 359-383   | 14 | 82(10)    | 1.66  |
|                        | 521 (77)  | 13 | 316 (31)  |       |
|                        | 386 (28)  | 12 | 518 (58)  |       |
| CXII-48<br>Sandstone   | 388-393   | 13 | 420 (83)  | 1.61  |
|                        | 528 (62)  |    |           |       |
|                        | 373 (37)  |    |           |       |
| GRÖ21<br>Gneiss        | 2500-4000 | 13 | 67 (20)   | 1.02  |
|                        | 173 (25)  | 11 | 173 (25)  |       |
|                        | 99 (9)    |    |           |       |
| GRÖ23<br>Sandstone     | 541-2500  | 13 | 136 (23)  | 1.07  |
|                        | 223 (22)  | 12 | 223 (22)  |       |
|                        | 162 (16)  |    |           |       |
| GRÖ36<br>Schist        | 2500-4000 | 13 | 100 (36)  | 0.931 |
|                        | 204 (32)  | 12 | 204 (32)  |       |
|                        | 146 (20)  |    |           |       |
| GRÖ64<br>Gneiss        | 2500-4000 | 13 | 138 (42)  | 1.004 |
|                        | 315 (47)  | 11 | 315 (47)  |       |
|                        | 160 (11)  |    |           |       |
| KP702<br>Granite       | 1600-2500 | 13 | 421 (84)  | 1.34  |
|                        | 838 (171) | 12 | 756 (138) |       |
|                        | 583 (69)  |    |           |       |

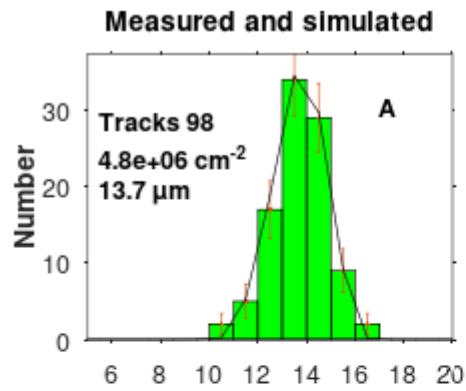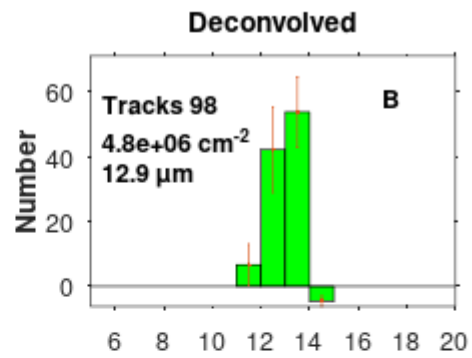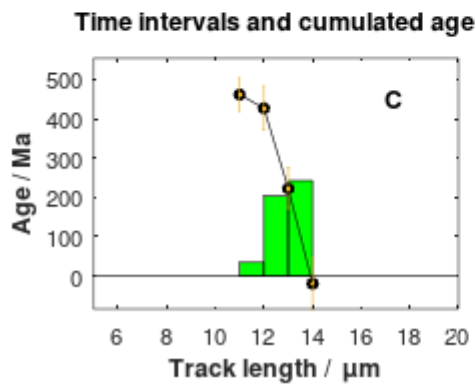

Fig. S1. C-XI-119.

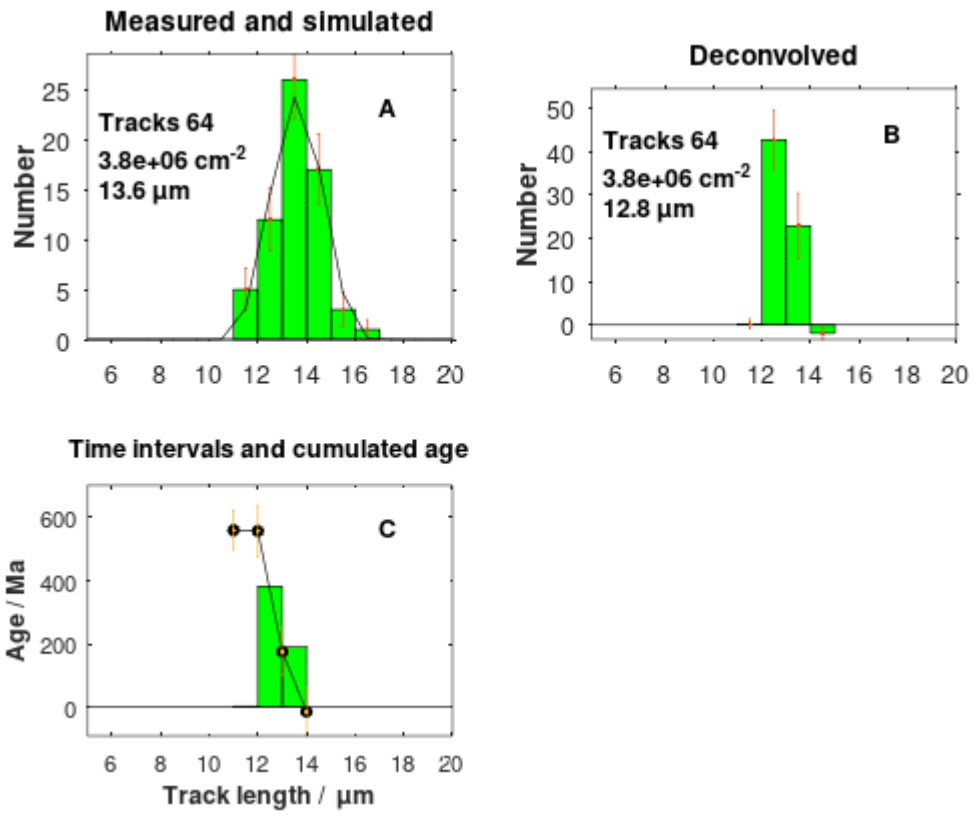

Fig. S2. C-XI-120.

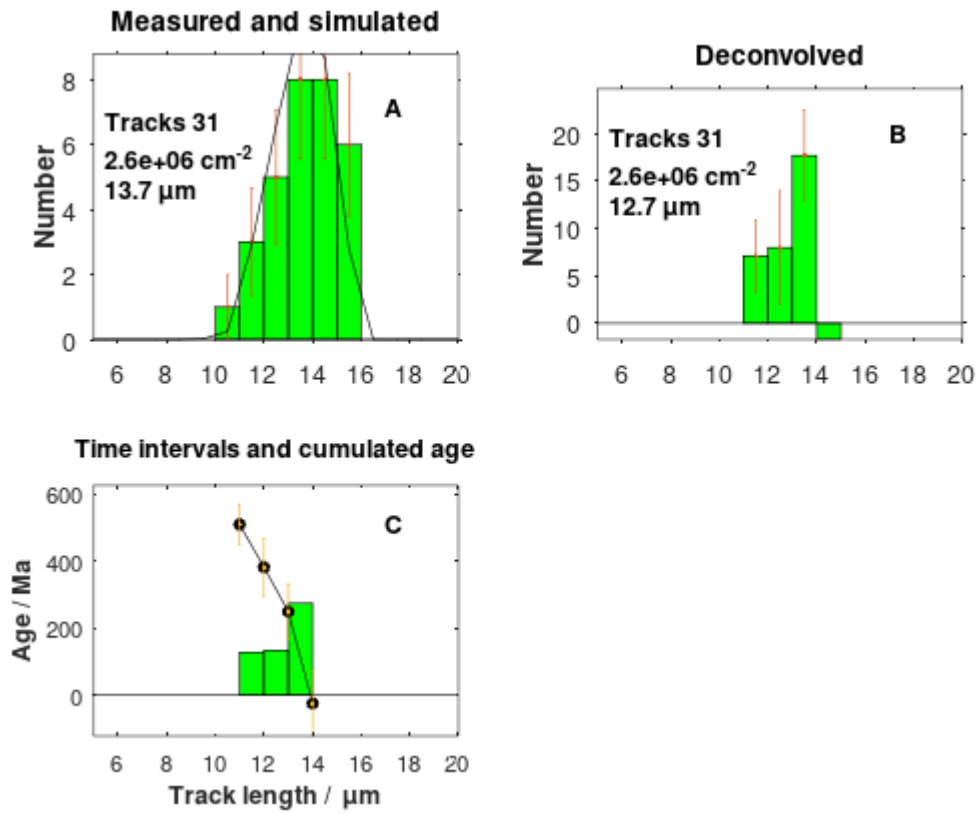

Fig. S3. C-XI-121.

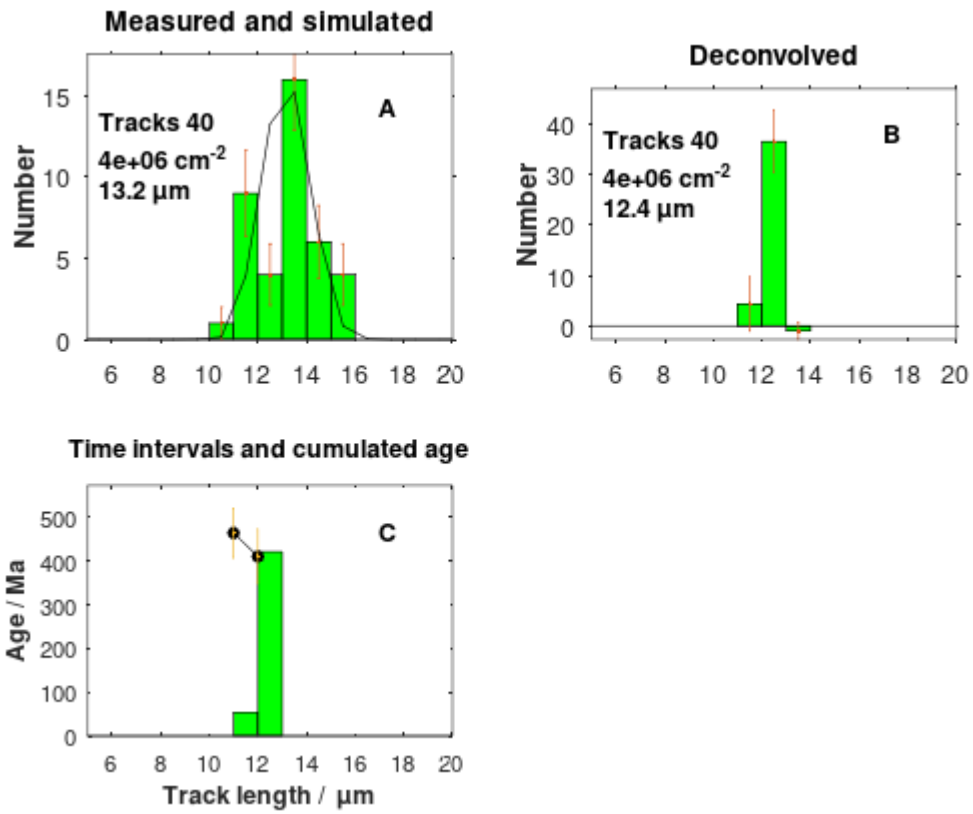

Fig. S4. C-XI-123.

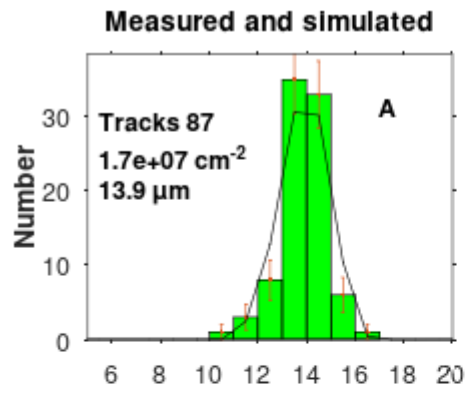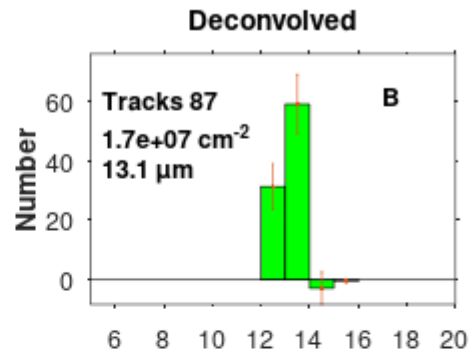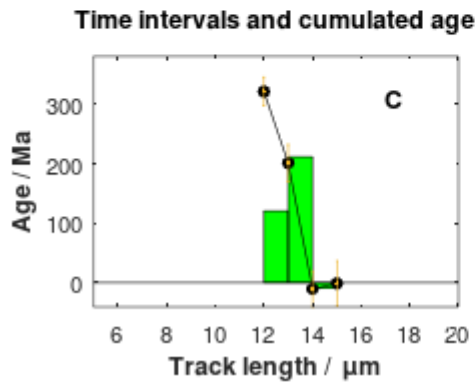

Fig. S5. C-XI-124.

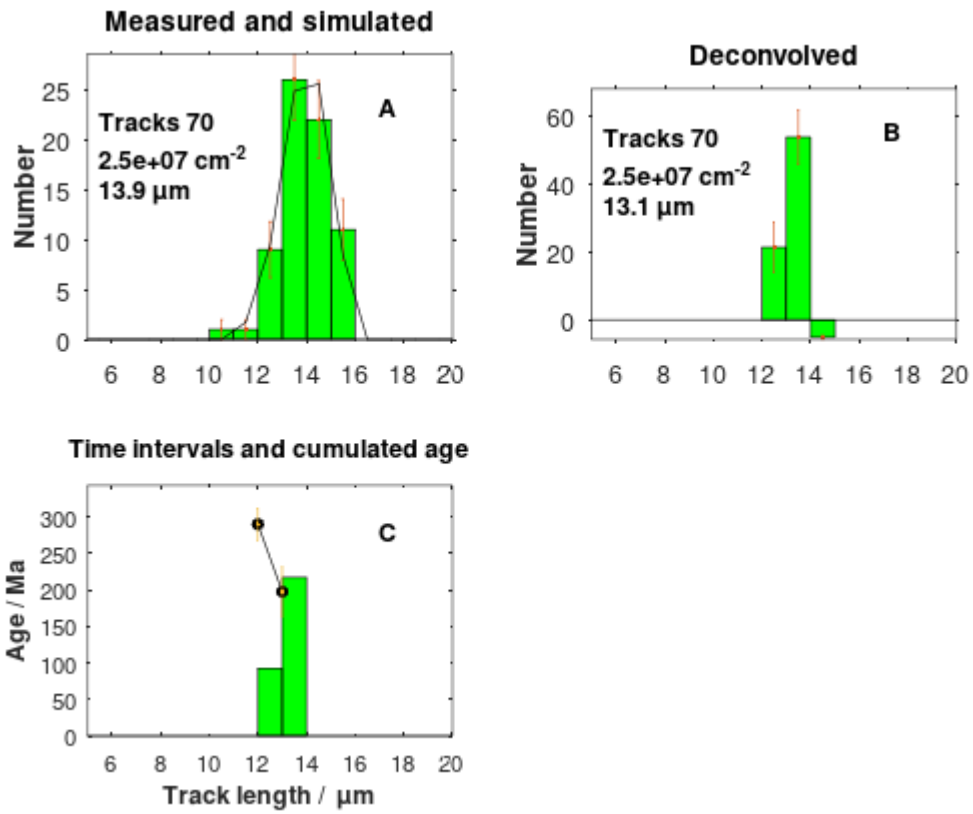

Fig. S6. C-XI-125.

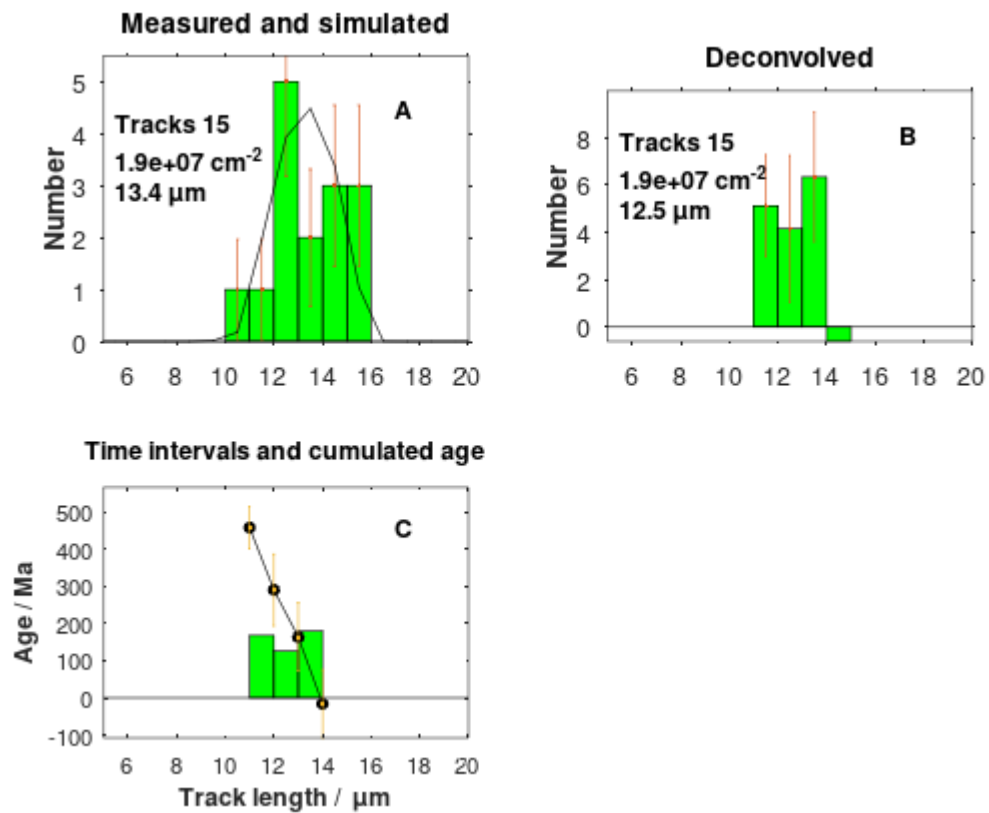

Fig. S7. C-XI-126.

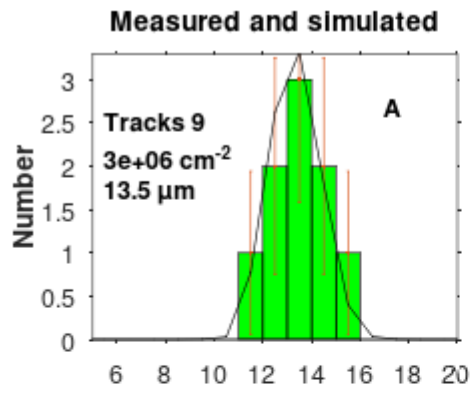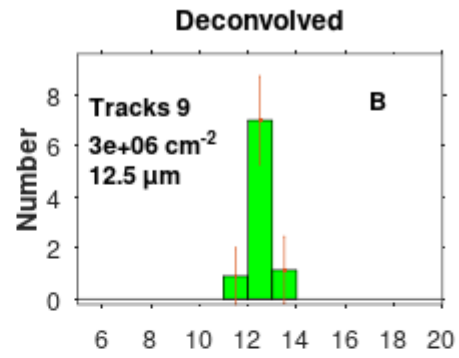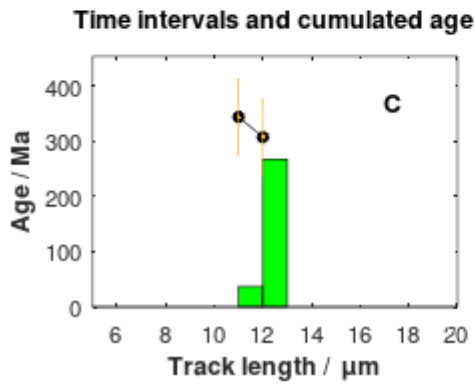

Fig. S8. CXII-06.

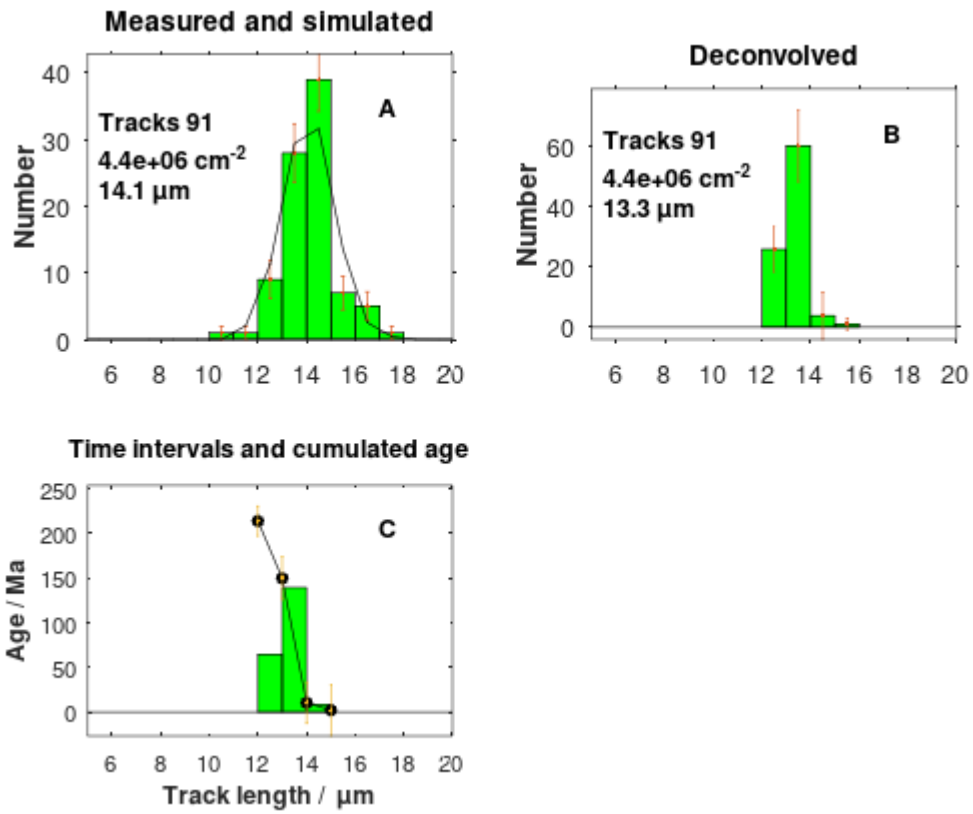

Fig. S9. CXII-13.

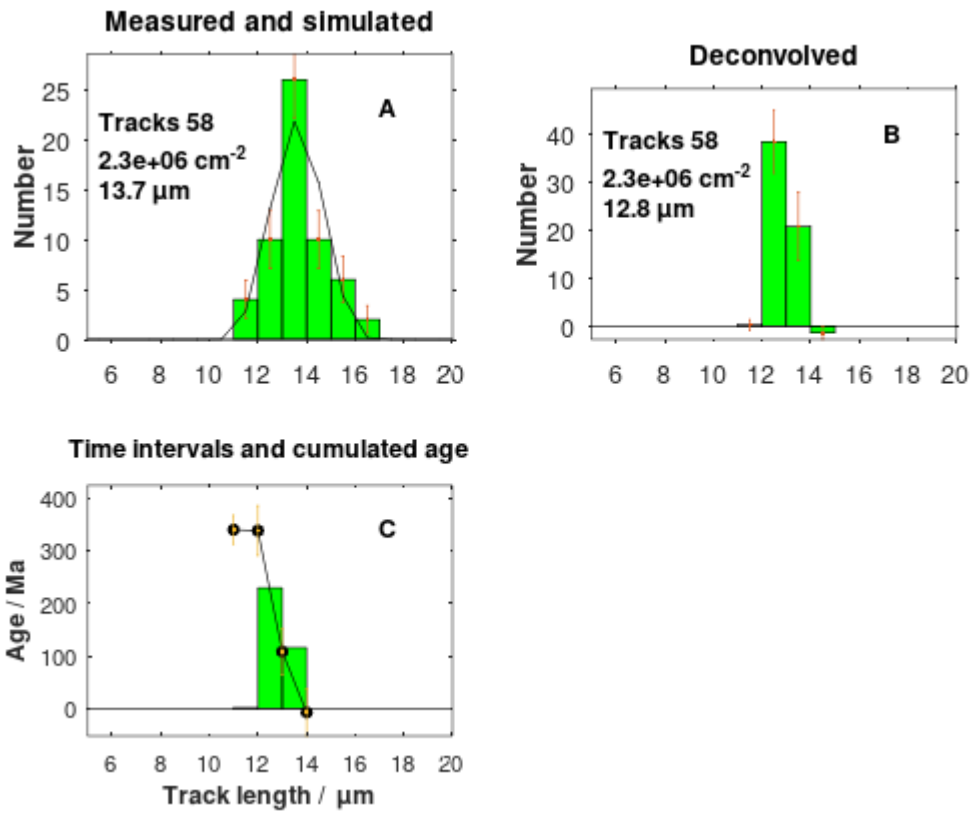

Fig. S10. CXII-14.

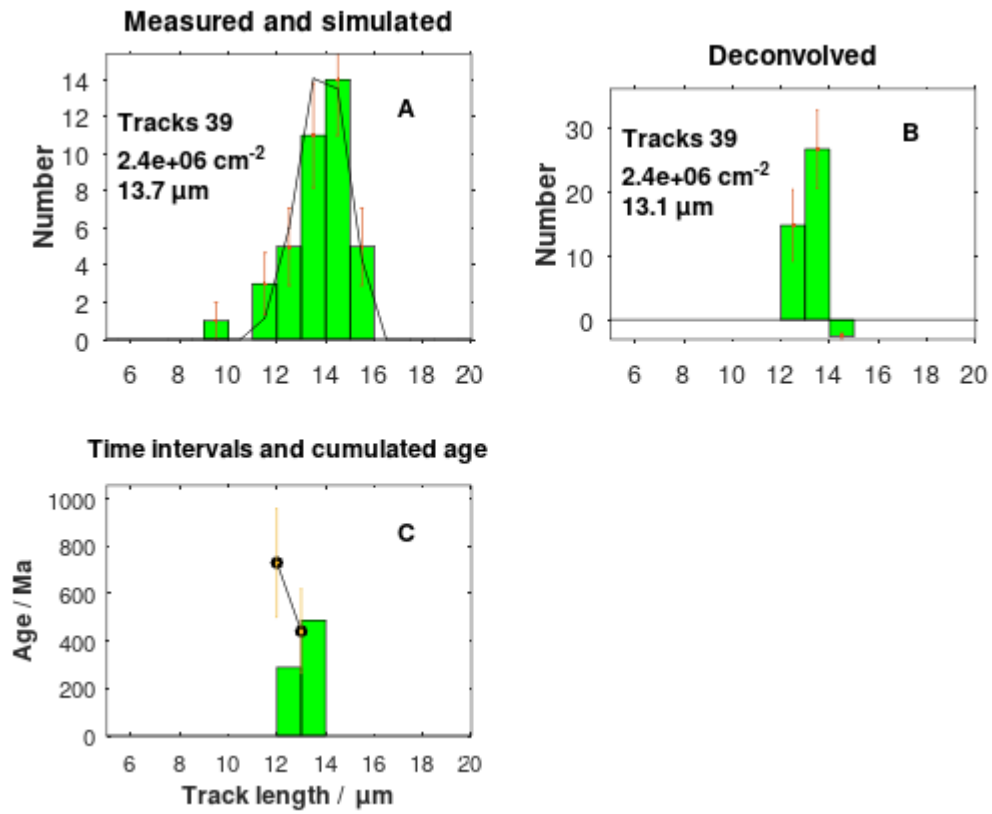

Fig. S11. CXII-20.

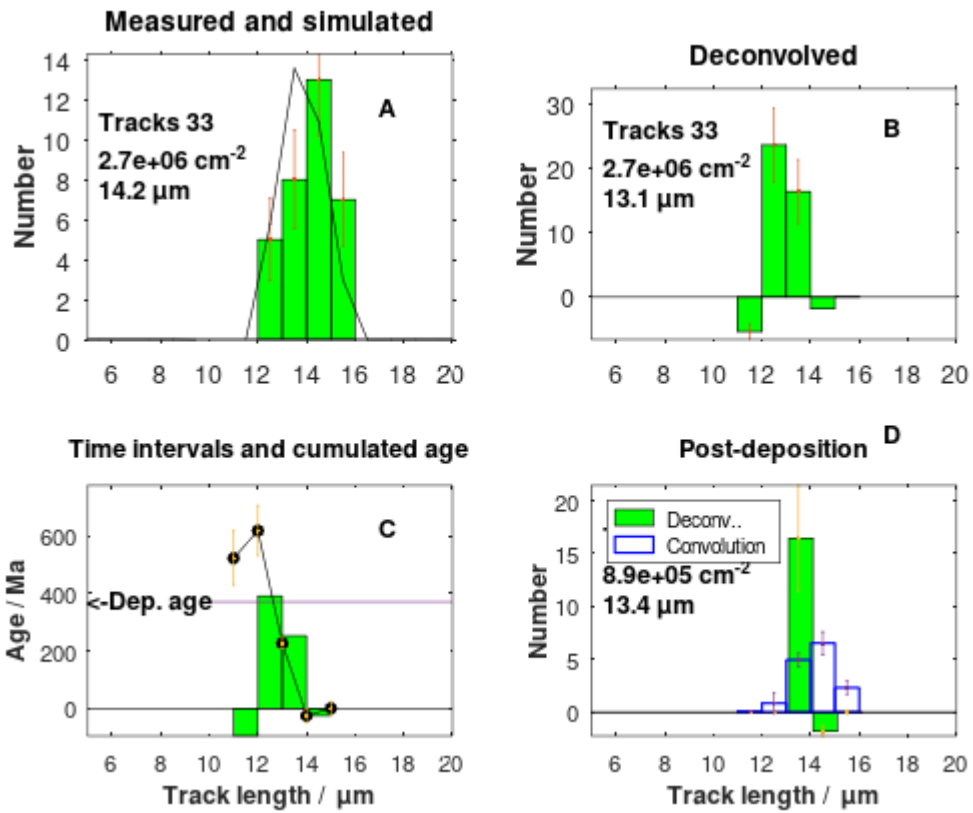

Fig. S12. CXII-22.

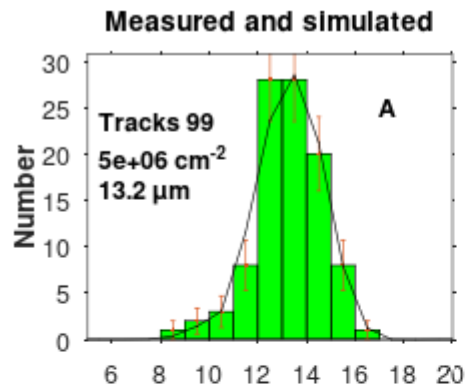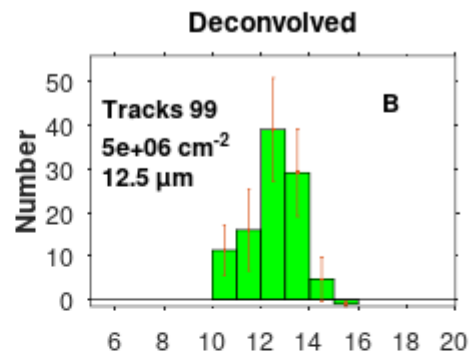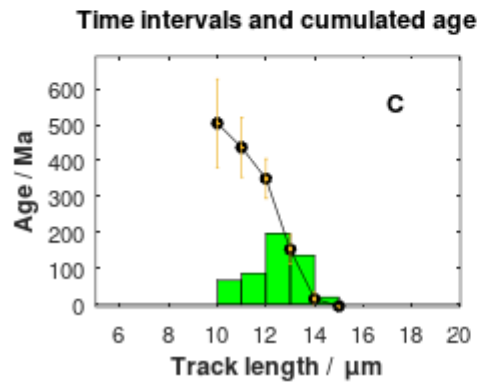

Fig. S13. CXII-25.

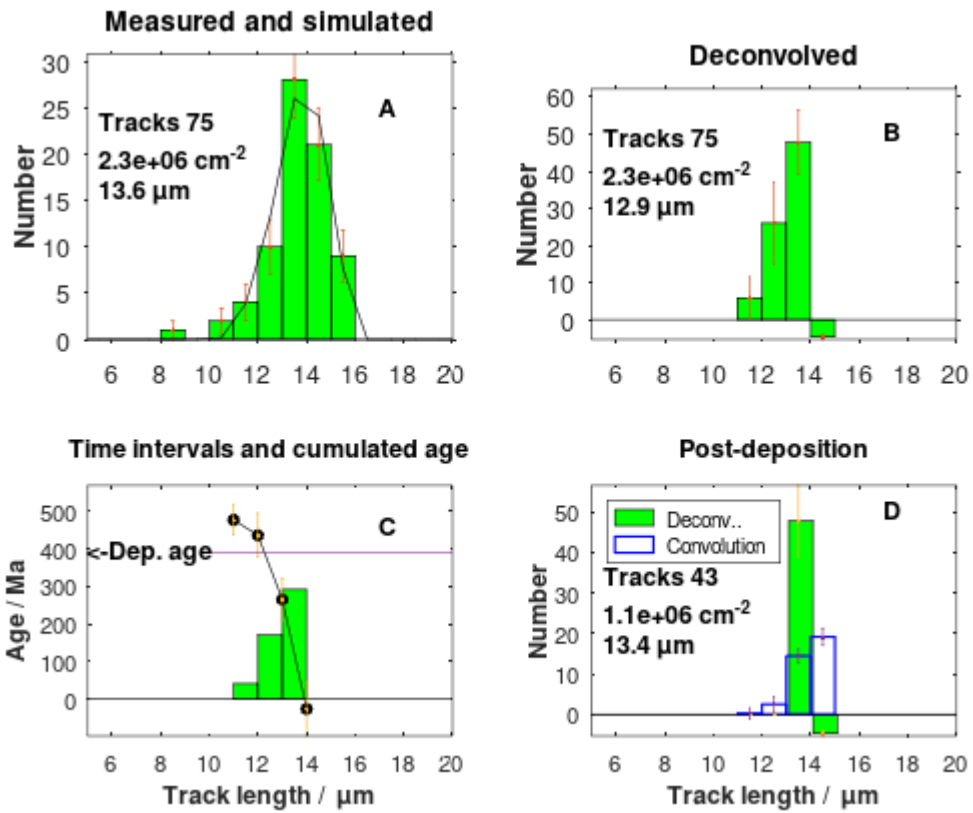

Fig. S14. CXII-27.

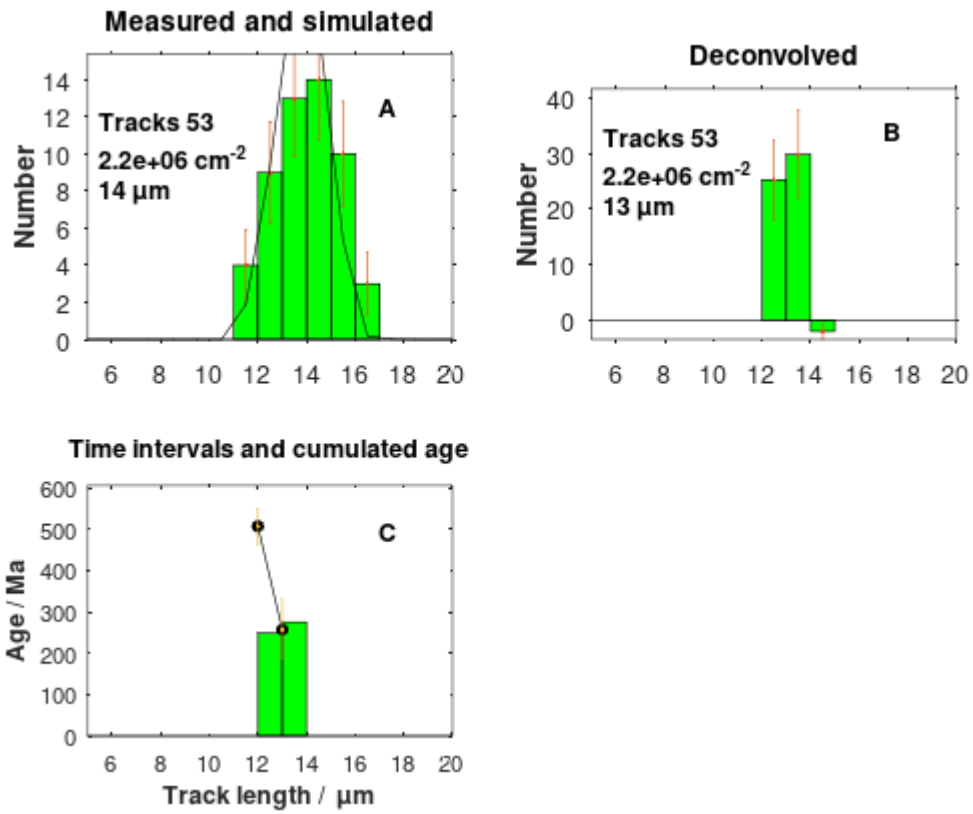

Fig. S15. CXII-30.

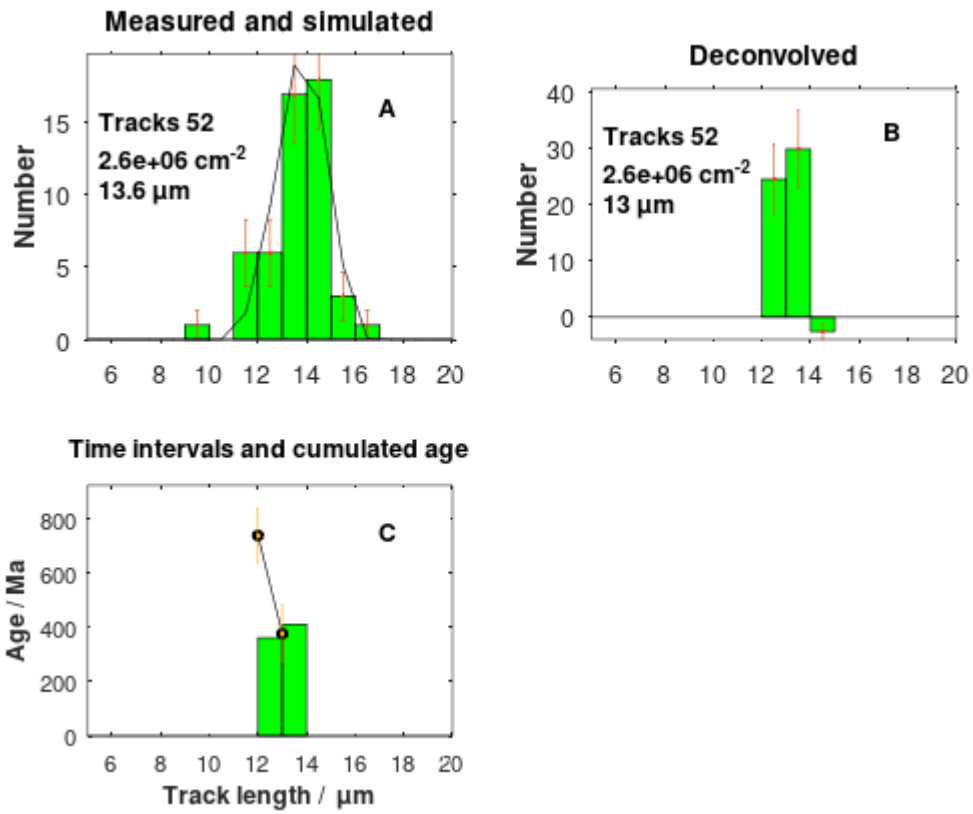

Fig. S16. CXII-36.

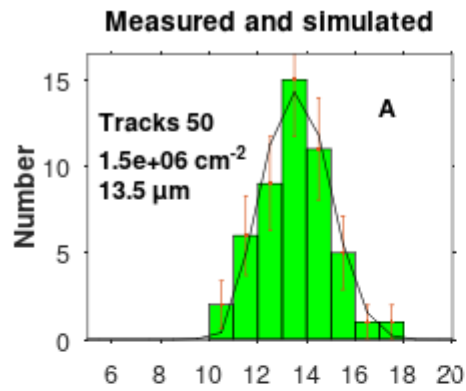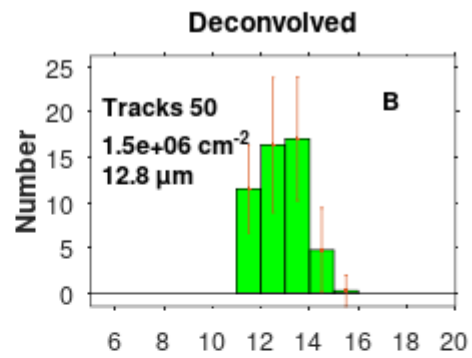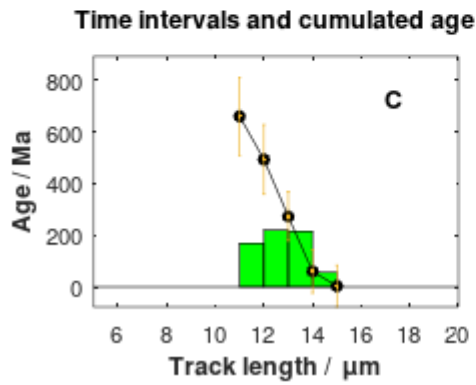

Fig. S17. CXII-37.

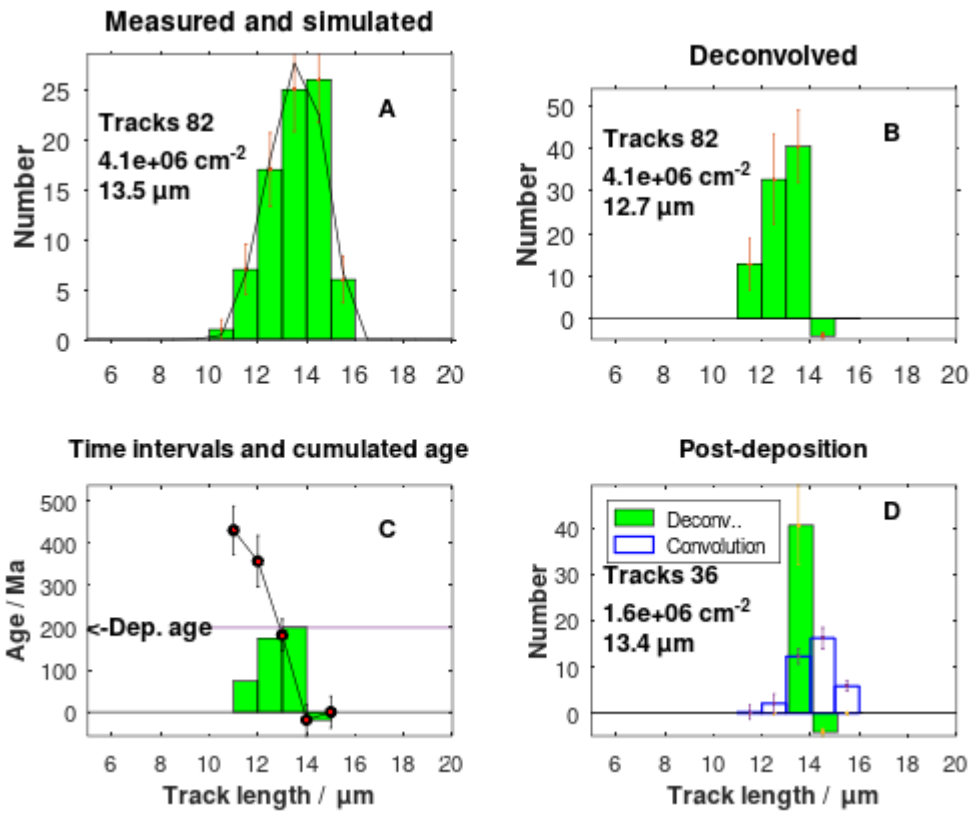

Fig. S18. CXII-42

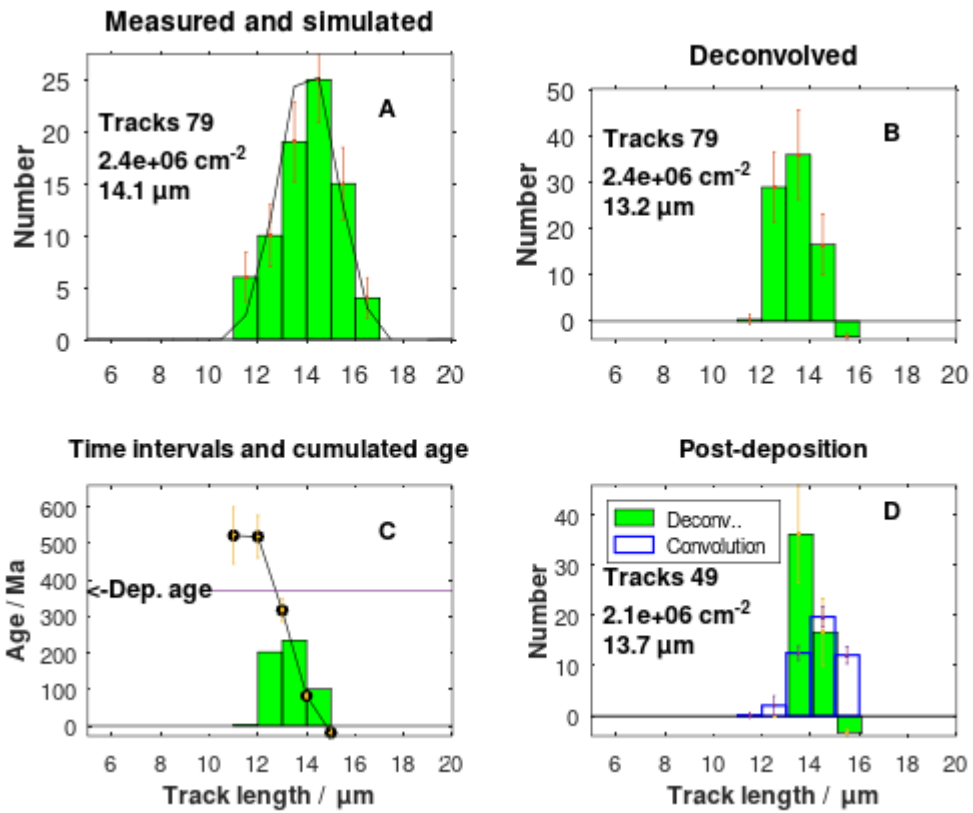

Fig. S19. CXII-46.

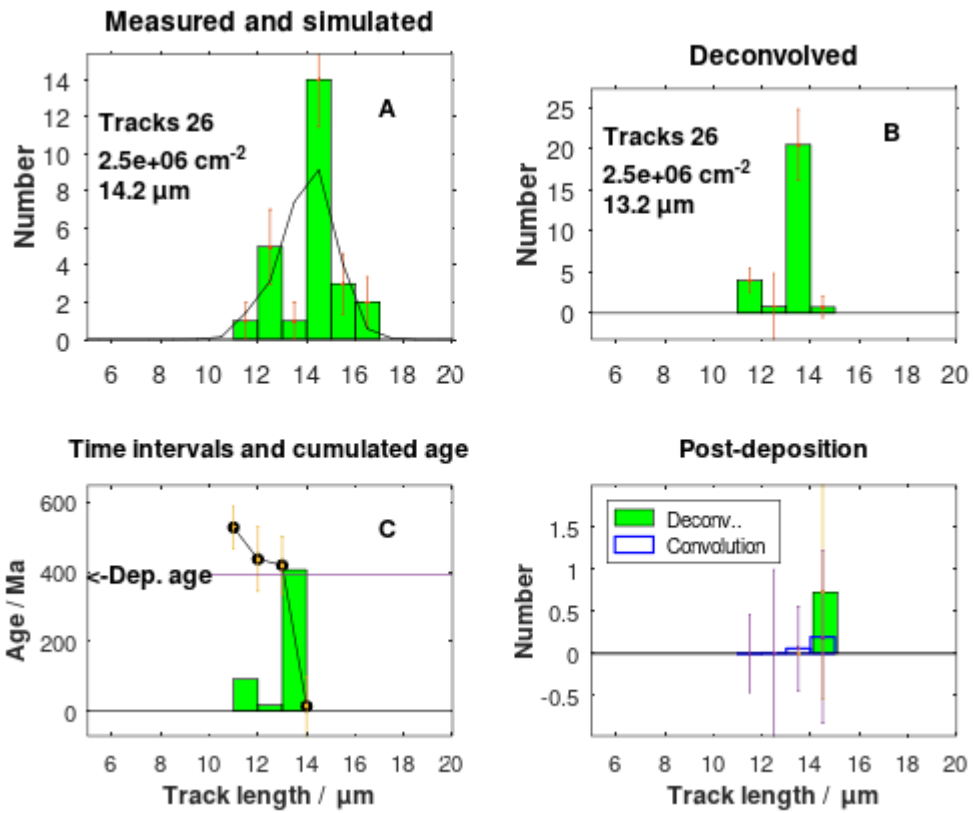

Fig. S20. CXII-48.

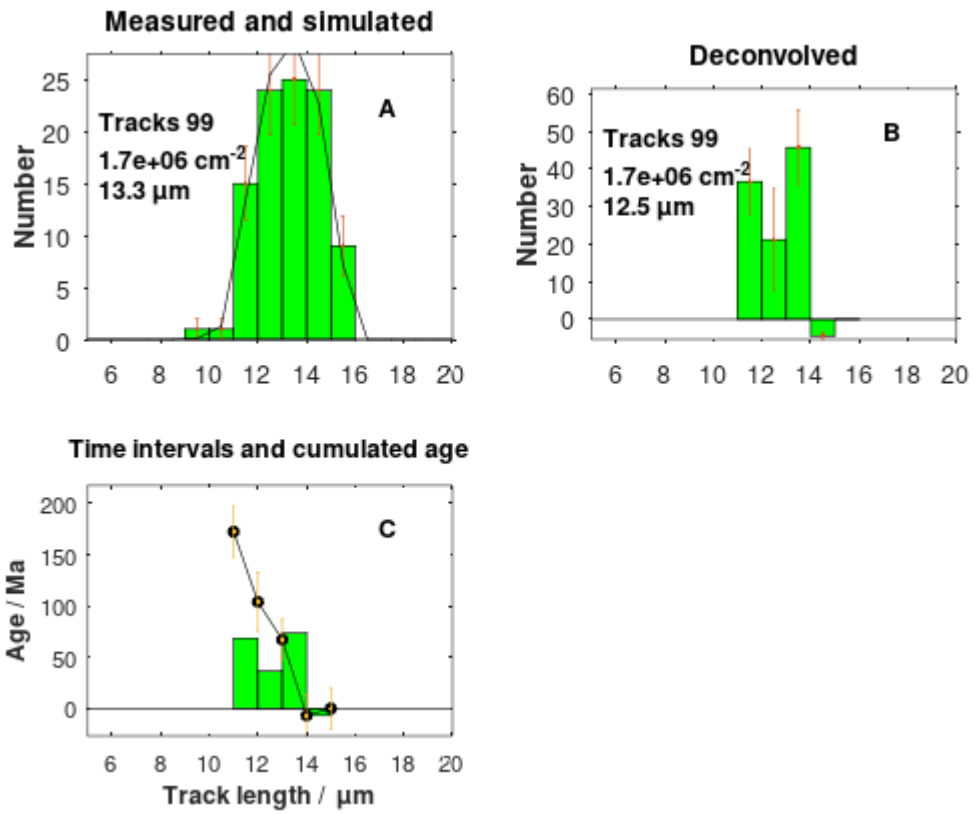

Fig. S21. GRÖ-21.

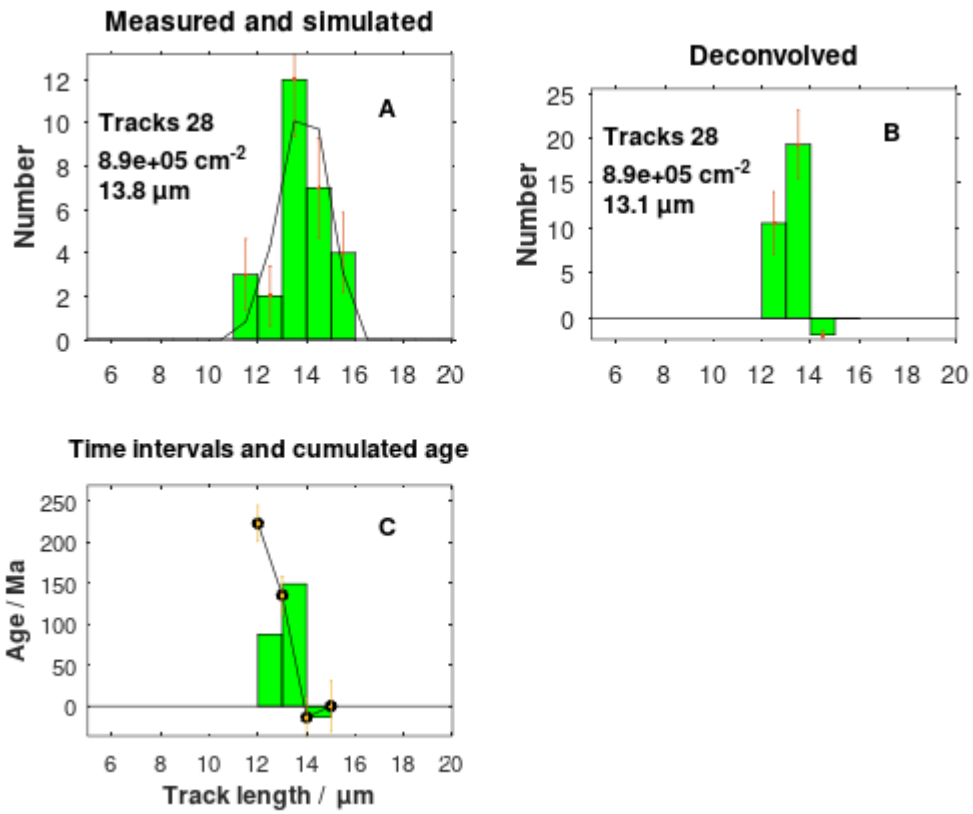

Fig. S22. GRÖ-23.

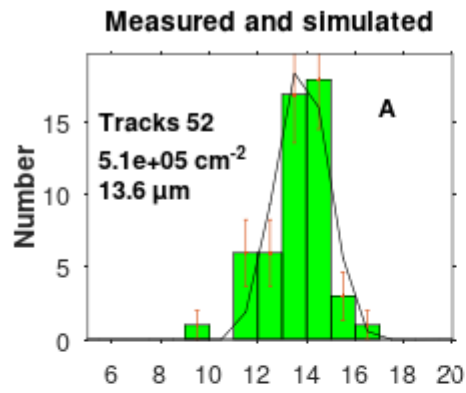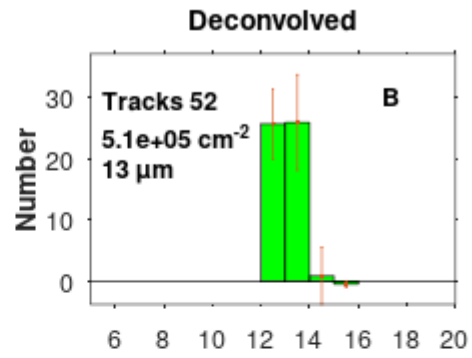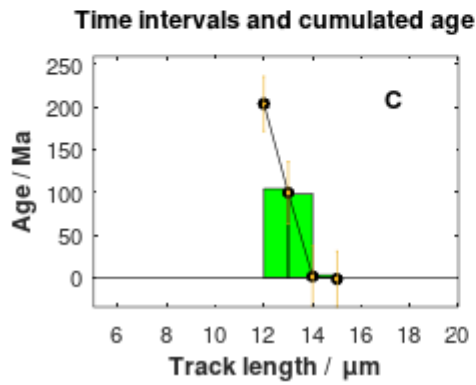

Fig. S23. GRÖ-36.

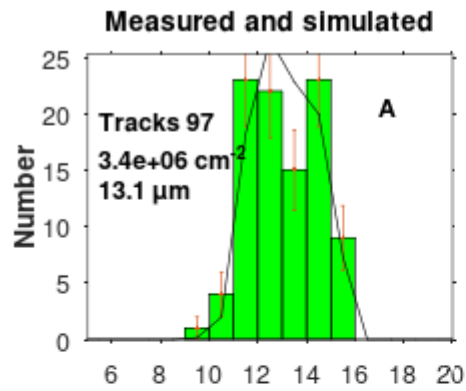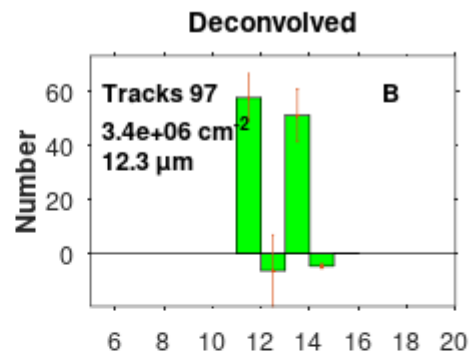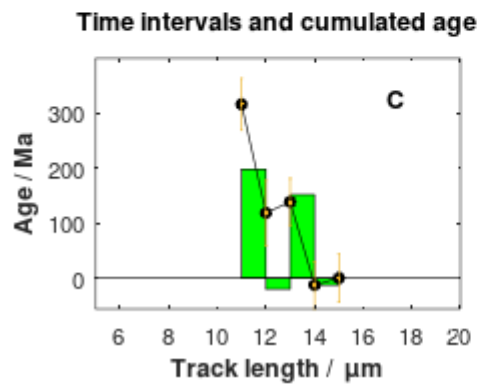

Fig. S24. GRÖ-64.

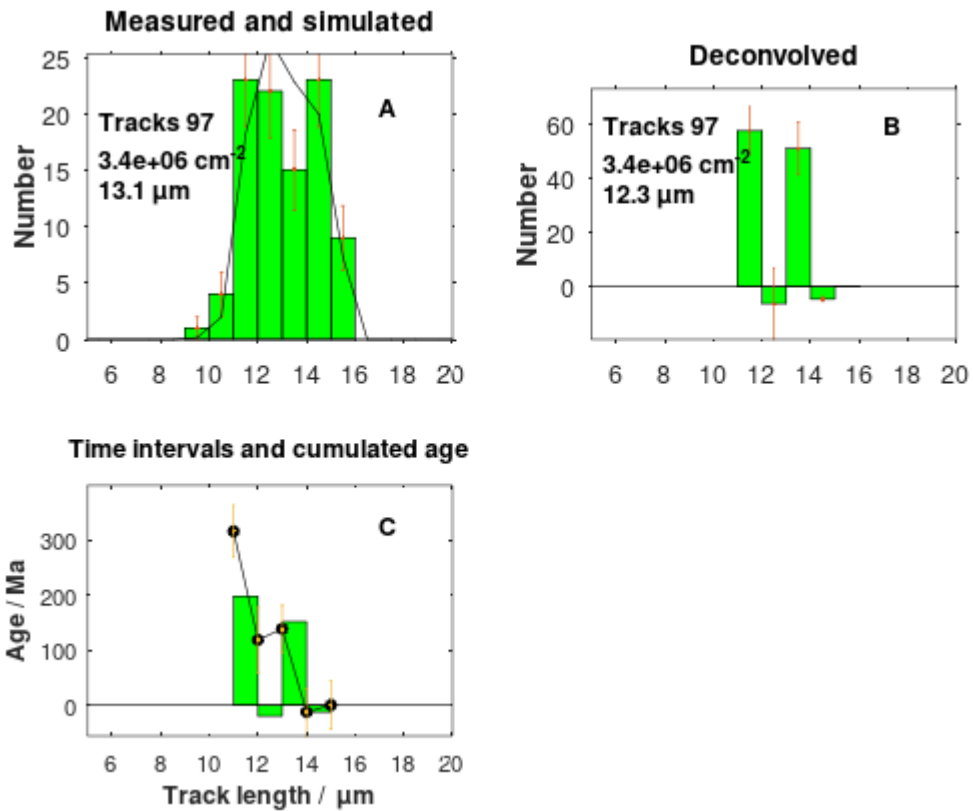

Fig. S25. KP702.

## References

Spiegel, C., Sohi, M. S., Reiter, W., Meier, K., Ventura, B., Lisker, F., et al. Phanerozoic tectonic and sedimentation history of the Arctic: Constraints from deep-time low-temperature thermochronology data of Ellesmere Island and Northwest Greenland. *Tectonics*, 42, e2022TC007579. <https://doi.org/10.1029/2022TC007579>, 2023a.

Spiegel, C., Sohi, M. S., Reiter, W., Meier, K., Ventura, B., Lisker, F., et al Supporting Information for Phanerozoic tectonic and sedimentation history of the Arctic: constraints from deep-time low-temperature thermochronology data of Ellesmere Island and Northwest Greenland <https://doi.org/10.5281/zenodo.8120628>, 2023b.
